# Supplementary material for: Aryl hydrocarbon receptor is required for optimal B‐cell proliferation
Source: PubMed Central journal article supplement (PMC5210087; doi:10.15252/embj.201695027), 2016-11-14
Supplement: EMBJ-36-116-s001.pdf [file EMBJ-36-116-s001.pdf]

## Appendix figures and tables

- Appendix figure S1. *Ahr*<sup>-/-</sup> mice show altered steady-state production of serum antibodies.
- Appendix figure S2. AhR deficiency does not affect survival of B cells.
- Appendix figure S3. AhR deficiency affects the number of steady-state splenic plasma cells but not steady-state bone marrow-resident plasma cells or immunization-derived plasma cells.
- Appendix figure S4. *Ahr* deletion does not alter p27kip1 expression, up-regulation of activation markers or calcium mobilization in B cells.
- Appendix figure S5. *Ccno* gene contains multiple Dioxin Response Elements (DREs).
  
- Appendix table S1. RNAseq top 20 down-regulated genes in *Ahr*<sup>-/-</sup> B cells.
- Appendix table S2. RNAseq top 20 up-regulated genes in *Ahr*<sup>-/-</sup> B cells.

# Appendix figure S1

**A**

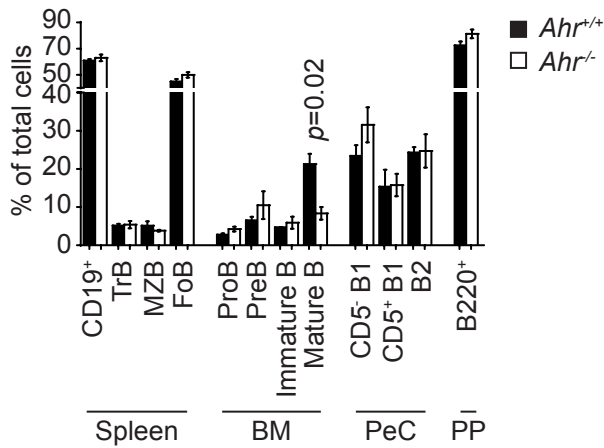

**B**

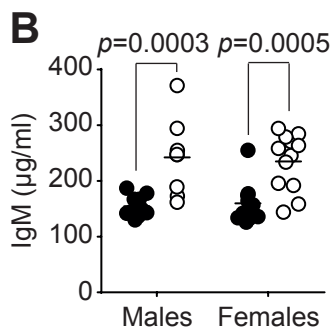

**C**

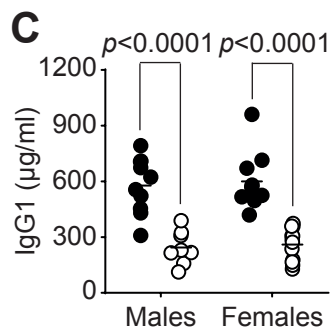

**D**

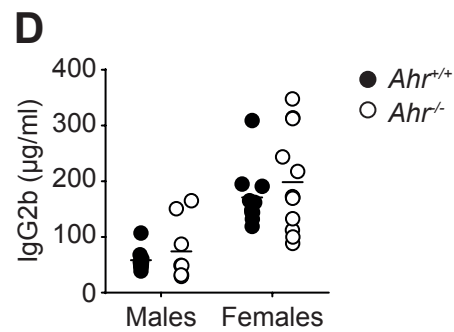

**E**

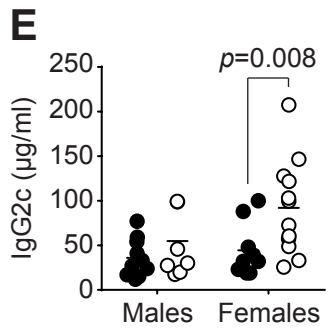

**F**

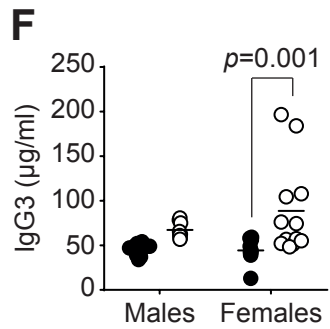

**G**

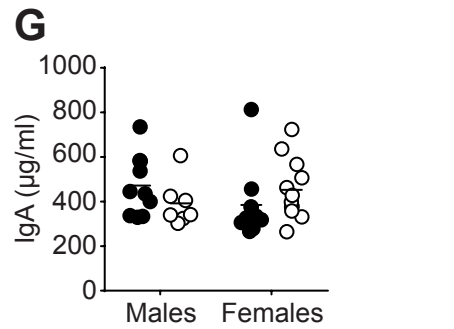

**Appendix figure S1. *Ahr*<sup>-/-</sup> mice show altered steady-state production of serum antibodies.**

**A** Flow cytometry analysis of distribution of B cell subsets sorted from spleen, bone marrow (BM), peritoneal cavity (PeC) and Peyer's patches (PP) of 8 weeks-old male non-immune *Ahr*<sup>+/+</sup> (black) and *Ahr*<sup>-/-</sup> (white) mice. n = 3 mice per group; mean ± SEM; unpaired two-tailed *t* test.

**B-G** ELISA quantification of indicated antibody isotypes in the serum of 8 weeks-old male and female non-immune *Ahr*<sup>+/+</sup> (black) and *Ahr*<sup>-/-</sup> (white) mice. Line indicates mean value; unpaired two-tailed *t* test.

## Appendix figure S2

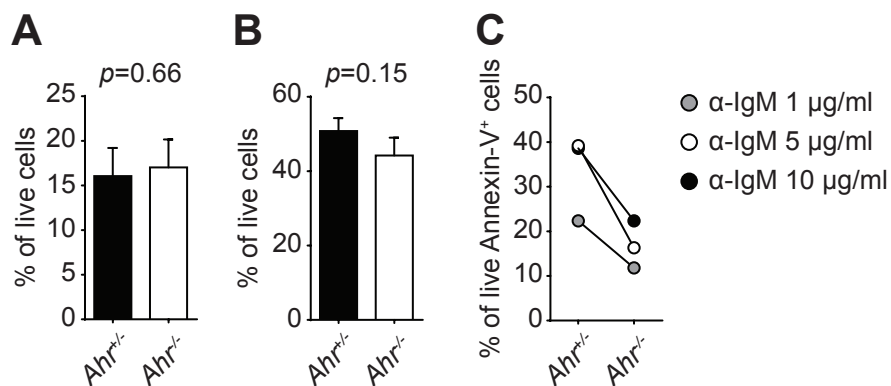

### Appendix figure S2. AhR deficiency does not affect survival of B cells.

**A** Flow cytometry analysis of splenic CD19<sup>+</sup> cells isolated from non-immune *Ahr*<sup>fl/+</sup>*mb1*<sup>Cre+</sup> (black) and *Ahr*<sup>fl/-</sup>*mb1*<sup>Cre+</sup> (white) mice and cultured for 72h in medium alone. Data from n = 4 independent experiments. Paired two-tailed *t* test.

**B** Flow cytometry analysis of splenic CD19<sup>+</sup> cells isolated from non-immune *Ahr*<sup>fl/+</sup>*mb1*<sup>Cre+</sup> (black) and *Ahr*<sup>fl/-</sup>*mb1*<sup>Cre+</sup> (white) mice and cultured for 72h with 20 ng/ml IL-4. Data from n = 4 independent experiments. Paired two-tailed *t* test.

**C** Flow cytometry analysis of splenic CD19<sup>+</sup> cells isolated from non-immune *Ahr*<sup>fl/+</sup>*mb1*<sup>Cre+</sup> and *Ahr*<sup>fl/-</sup>*mb1*<sup>Cre+</sup> mice and cultured for 24h with the indicated stimuli. Data from n = 1 experiment.

## Appendix figure S3

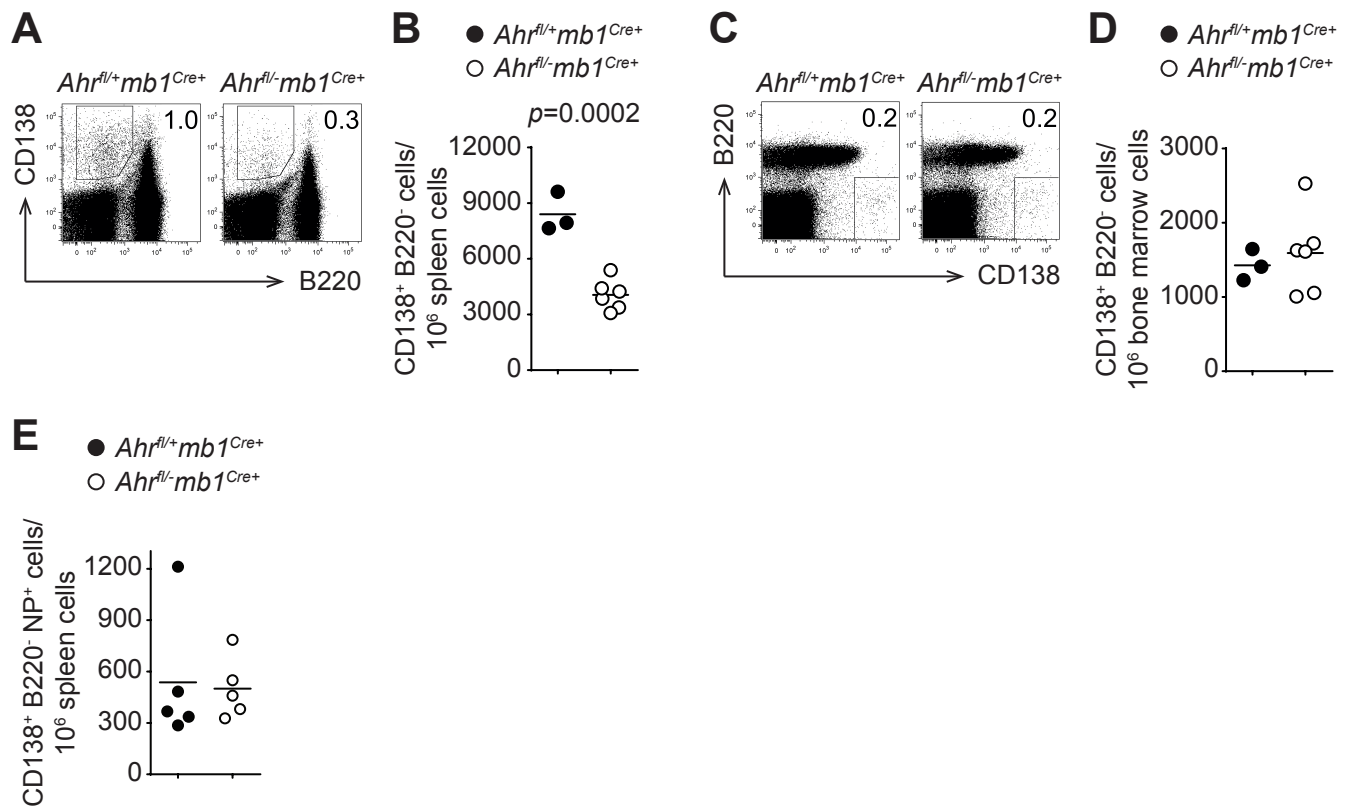

**Appendix figure S3. AhR deficiency affects the number of steady-state splenic plasma cells but not steady-state bone marrow-resident plasma cells or immunization-derived plasma cells.**

**A, C** Flow cytometry analysis of distribution of splenic (A) and bone marrow (C) B220<sup>+</sup> CD138<sup>+</sup> plasma cells in non-immune *Ahr<sup>fl/+</sup>mb1<sup>Cre+</sup>* (black) and *Ahr<sup>fl/-</sup>mb1<sup>Cre+</sup>* (white) mice. Representative data of n = 2 independent experiments.

**B, D** Number of plasma cells per 10<sup>6</sup> total cells in spleen (B) and bone marrow (D), as gated in A and C. n = 2 independent experiments; lines indicate mean; unpaired two-tailed *t* test.

**E** Number of NP-specific plasma cells per 10<sup>6</sup> total cells in spleen of *Ahr<sup>fl/+</sup>mb1<sup>Cre+</sup>* (black) and *Ahr<sup>fl/-</sup>mb1<sup>Cre+</sup>* (white) mice immunized i.p. with 10 μg/mouse of the T-dependent model antigen NP-CGG, 7 days post-challenge. n = 1 experiment; lines indicate mean.



## Appendix figure S4

**A**

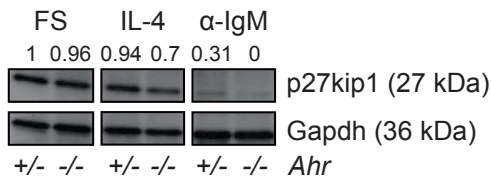

**B**

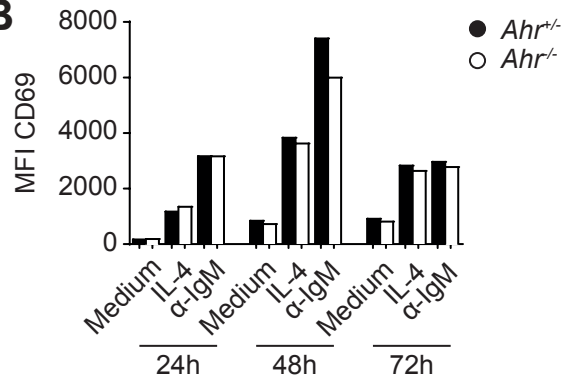

**E**

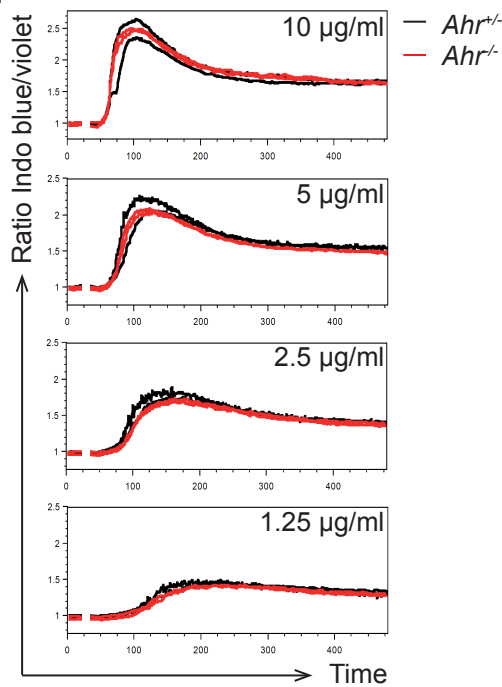

**C**

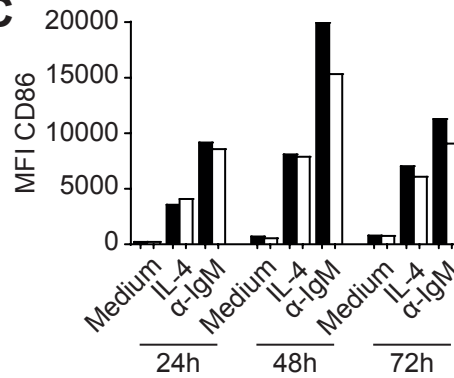

**D**

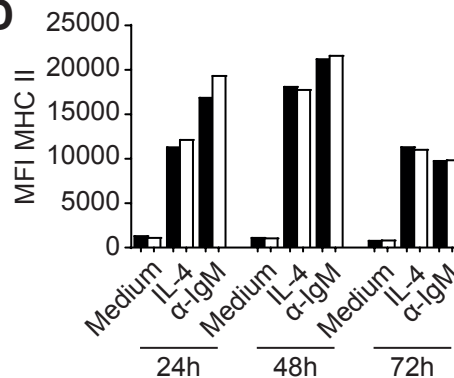

**Appendix figure S4. *Ahr* deletion does not alter p27kip1 expression, up-regulation of activation markers or calcium mobilization in B cells.**

**A** Western blot of whole protein extract from splenic CD19<sup>+</sup> cells isolated from non-immune *Ahr<sup>fl/+</sup>mb1<sup>Cre+</sup>* (*Ahr<sup>+/+</sup>* B cells) and *Ahr<sup>fl/-</sup>mb1<sup>Cre+</sup>* (*Ahr<sup>-/-</sup>* B cells) mice and cultured for 24h as indicated ( $\alpha$ -IgM 5  $\mu$ g/ml). Values above the blots indicate p27kip1 protein quantification obtained by densitometry, normalized to Gapdh and compared to FS *Ahr<sup>fl/+</sup>mb1<sup>Cre+</sup>* sample. Data from n = 1 experiment. FS: freshly sorted.

**B-D** Flow cytometry analysis of CD69 (B), CD86 (C) and MHC II (D) surface expression, indicated as mean fluorescence intensity (MFI), on splenic CD19<sup>+</sup> cells isolated from non-immune *Ahr<sup>fl/+</sup>mb1<sup>Cre+</sup>* (black) and *Ahr<sup>fl/-</sup>mb1<sup>Cre+</sup>* (white) mice and cultured as indicated ( $\alpha$ -IgM 5  $\mu$ g/ml). Data from n = 1 experiment.

**E** Flow cytometry analysis of calcium flux (indicated as ratio Indo blue/violet) over time of FoB cells isolated from non-immune *Ahr<sup>fl/+</sup>mb1<sup>Cre+</sup>* (black) and *Ahr<sup>fl/-</sup>mb1<sup>Cre+</sup>* (red) mice and stimulated with  $\alpha$ -IgM at the indicated concentrations. Representative data of n = 2 independent experiments.

## Appendix figure S5

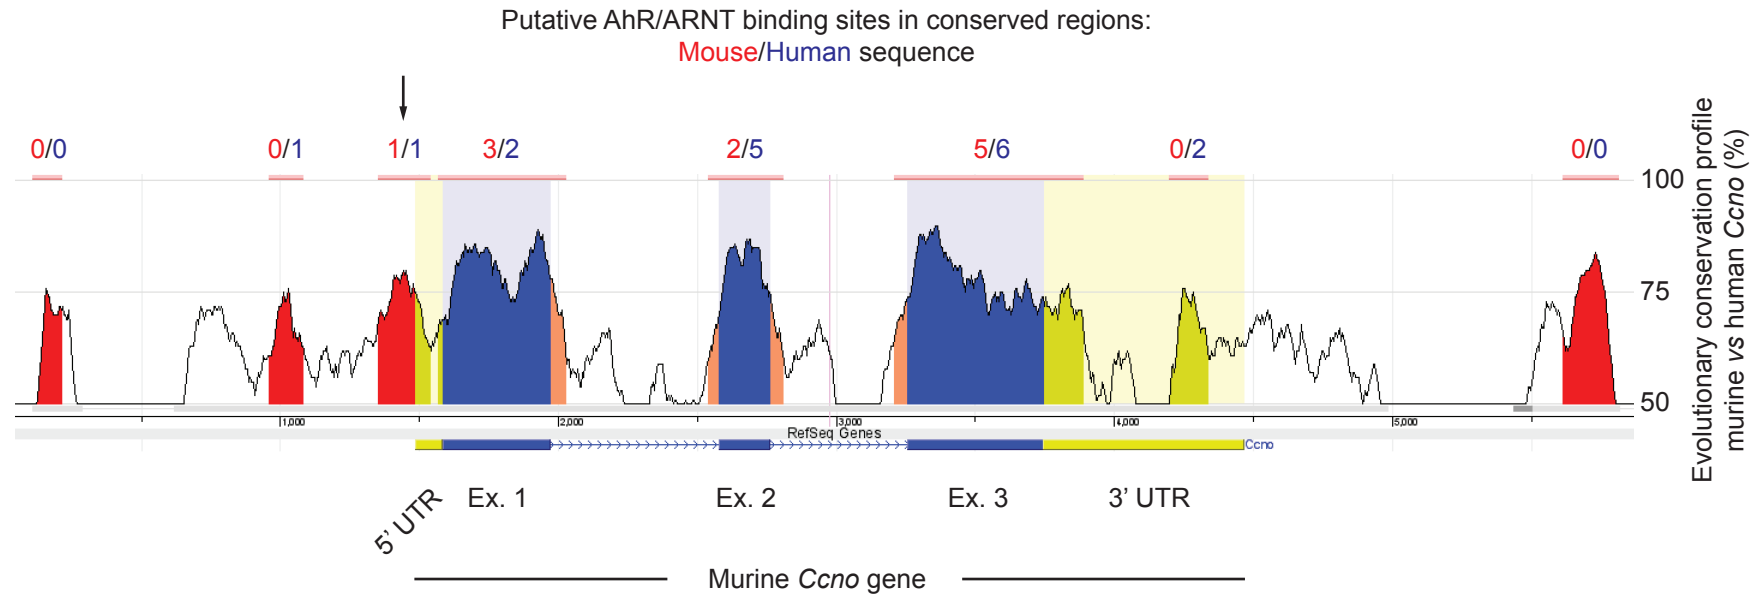

### Appendix figure S5. *Ccno* gene contains multiple Dioxin Response Elements (DREs).

Conservation analysis was performed between mouse and human *Ccno* sequences to identify conserved regions that are likely to contain putative DREs. Analysis showed that several regions within the *Ccno* locus contains conserved putative DREs. A putative conserved DRE was identified in proximity to the 5' UTR. This DRE is localized into the region bound by AhR, as shown in Figure 6F. Threshold for sequence similarity: 75%. Threshold for AhR/ARNT binding site sequence similarity: 80%. Analysis performed on ECR Browser.

## Appendix table S1

| Gene symbol          | ENSEMBL gene ID     | Description                                | Function                                   | Avg read count<br><i>Ahr</i> <sup>+/+</sup> | Avg read count<br><i>Ahr</i> <sup>-/-</sup> | Fold change<br><i>Ahr</i> <sup>+/+</sup> vs <i>Ahr</i> <sup>-/-</sup> | Adjusted<br>p value     |
|----------------------|---------------------|--------------------------------------------|--------------------------------------------|---------------------------------------------|---------------------------------------------|-----------------------------------------------------------------------|-------------------------|
| <i>Cyp1b1</i>        | ENSMUSG00000024087  | Cytochrome P450 1B1                        | Detoxification                             | 207                                         | 0                                           | - infinite                                                            | $7.23 \times 10^{-19}$  |
| <i>Myl10</i>         | ENSMUSG00000005474  | Myosin regulatory light chain 10           | Regulation of actin cytoskeleton           | 8                                           | 0                                           | - infinite                                                            | 0.00236                 |
| <i>Tmprss4</i>       | ENSMUSG000000032091 | Transmembrane protease serine 4            | Serine protease                            | 9                                           | 0                                           | - infinite                                                            | $2.15 \times 10^{-5}$   |
| <i>Cyp1a1</i>        | ENSMUSG000000032315 | Cytochrome P450 1A1                        | Detoxification                             | 4733                                        | 5                                           | -979                                                                  | $3.34 \times 10^{-114}$ |
| <i>Ahr</i>           | ENSMUSG000000021575 | Aryl hydrocarbon receptor repressor        | Transcriptional repressor of AhR pathway   | 297                                         | 2                                           | -178                                                                  | $1.85 \times 10^{-74}$  |
| <i>Ccno</i>          | ENSMUSG000000042417 | Cyclin-O                                   | Cell cycle; multiciliogenesis              | 94                                          | 1                                           | -119                                                                  | $2.95 \times 10^{-42}$  |
| <i>Sema3b</i>        | ENSMUSG000000057969 | Semaphorin 3B                              | Neuronal development                       | 44                                          | 1                                           | -58                                                                   | $2.82 \times 10^{-15}$  |
| <i>Rtn4rl2</i>       | ENSMUSG000000050896 | Reticulon 4 receptor-like 2                | Neuronal development                       | 12                                          | 0                                           | -56                                                                   | 0.00043                 |
| <i>Fhod3</i>         | ENSMUSG000000034295 | Formin homology 2 domain containing 3      | Regulation of actin cytoskeleton           | 14                                          | 0                                           | -52                                                                   | 0.00196                 |
| <i>Mpp2</i>          | ENSMUSG000000017314 | MAGUK p55 subfamily member 2               | Cytoskeleton regulation                    | 32                                          | 1                                           | -50                                                                   | $3.39 \times 10^{-13}$  |
| <i>Asb2</i>          | ENSMUSG000000021200 | Ankyrin repeat and SOCS box protein 2      | Protein degradation                        | 334                                         | 8                                           | -44                                                                   | $7.1 \times 10^{-12}$   |
| <i>Gm15880</i>       | ENSMUSG000000084821 | Predicted gene 15880                       |                                            | 9                                           | 0                                           | -42                                                                   | 0.00019                 |
| <i>1700030C10Rik</i> | ENSMUSG000000099759 | RIKEN cDNA 1700030C10 gene                 |                                            | 33                                          | 1                                           | -39                                                                   | $1.71 \times 10^{-12}$  |
| <i>Ovo1</i>          | ENSMUSG000000024922 | Putative transcription factor Ovo-like 1   | Transcription factor                       | 22                                          | 1                                           | -31                                                                   | $2.23 \times 10^{-5}$   |
| <i>Muc19</i>         | ENSMUSG000000044021 | Mucin 19                                   | Glycoprotein involved in mucus formation   | 14                                          | 1                                           | -25                                                                   | $3.71 \times 10^{-5}$   |
| <i>Hic1</i>          | ENSMUSG000000043099 | Hypermethylated in cancer 1 protein        | Tumor repressor; transcriptional repressor | 2293                                        | 98                                          | -23                                                                   | 0                       |
| <i>Nqo1</i>          | ENSMUSG00000003849  | NAD(P)H quinone dehydrogenase 1            | Reductase                                  | 1102                                        | 49                                          | -23                                                                   | $6.29 \times 10^{-266}$ |
| <i>Pltp</i>          | ENSMUSG000000017754 | Phospholipid transfer protein              | Lipid metabolism                           | 1277                                        | 59                                          | -22                                                                   | $7.49 \times 10^{-172}$ |
| <i>Tiparp</i>        | ENSMUSG000000034640 | TCDD-inducible poly(ADP-Ribose) polymerase | Poly(ADP-ribose) polymerase                | 21667                                       | 1098                                        | -20                                                                   | 0                       |
| <i>Bfsp1</i>         | ENSMUSG000000027420 | Beaded filament structural protein 1       | Structural protein                         | 18                                          | 1                                           | -19                                                                   | $1.51 \times 10^{-5}$   |

### Appendix table S1. RNAseq top 20 down-regulated genes in *Ahr*<sup>-/-</sup> B cells.

CD19<sup>+</sup> cells were isolated from *Ahr*<sup>+/+</sup> and *Ahr*<sup>-/-</sup> mice and cultured for 4h in presence of 10 µg/ml α-IgM and 20 ng/ml IL-4, followed by additional 4h in presence of 250 nM FICZ. Genes were ranked according to decreasing fold change difference between *Ahr*<sup>+/+</sup> and *Ahr*<sup>-/-</sup> B cells. Gene symbol was assigned according to the MGI database. Average (avg) read counts indicate the number of reads per gene and are directly proportional to the extent of gene expression.

## Appendix table S2

| <i>Gene symbol</i>   | <i>ENSEMBL gene ID</i> | <i>Description</i>                               | <i>Function</i>                            | <i>Avg read count<br/>Ahr<sup>+/+</sup></i> | <i>Avg read count<br/>Ahr<sup>-/-</sup></i> | <i>Fold change<br/>Ahr<sup>+/+</sup> vs Ahr<sup>-/-</sup></i> | <i>Adjusted<br/>p value</i> |
|----------------------|------------------------|--------------------------------------------------|--------------------------------------------|---------------------------------------------|---------------------------------------------|---------------------------------------------------------------|-----------------------------|
| <i>Kifc3</i>         | ENSMUSG000000031788    | Kinesin family member C3                         | Cell cycle                                 | 62                                          | 257                                         | 4                                                             | 3.22 x 10 <sup>-23</sup>    |
| <i>Chdh</i>          | ENSMUSG000000015970    | Choline dehydrogenase                            | Lipid/neurotransmitter metabolism          | 6                                           | 27                                          | 4                                                             | 5.46 x 10 <sup>-5</sup>     |
| <i>Fam83f</i>        | ENSMUSG000000022408    | Family with sequence similarity 83, member F     |                                            | 37                                          | 159                                         | 4                                                             | 4.08 x 10 <sup>-15</sup>    |
| <i>Gpr35</i>         | ENSMUSG000000026271    | G protein-coupled receptor 35                    | Receptor for kynurenic acid                | 8                                           | 37                                          | 4                                                             | 8.83 x 10 <sup>-4</sup>     |
| <i>Mcam</i>          | ENSMUSG000000032135    | Melanoma cell adhesion molecule                  | Cell adhesion                              | 7                                           | 32                                          | 4                                                             | 7.05 x 10 <sup>-5</sup>     |
| <i>Stard13</i>       | ENSMUSG000000016128    | STAR-related lipid transfer domain containing 13 | Cytoskeleton regulation                    | 3                                           | 16                                          | 5                                                             | 8.17 x 10 <sup>-4</sup>     |
| <i>Klk1</i>          | ENSMUSG000000063903    | Kallikrein 1                                     | Serine protease                            | 8                                           | 37                                          | 5                                                             | 8.62 x 10 <sup>-7</sup>     |
| <i>Siglech</i>       | ENSMUSG000000051504    | sialic acid binding Ig-like lectin H             | Immune inhibitory receptor                 | 51                                          | 243                                         | 5                                                             | 5.6 x 10 <sup>-39</sup>     |
| <i>Lair1</i>         | ENSMUSG000000055541    | Leukocyte-associated Ig-like receptor 1          | Immune inhibitory receptor                 | 11                                          | 55                                          | 5                                                             | 1.34 x 10 <sup>-6</sup>     |
| <i>Fabp4</i>         | ENSMUSG000000062515    | Fatty acid binding protein 4                     | Lipid transport protein                    | 5                                           | 26                                          | 5                                                             | 6.11 x 10 <sup>-4</sup>     |
| <i>3830403N18Rik</i> | ENSMUSG000000031125    | RIKEN cDNA 3830403N18 gene                       |                                            | 6                                           | 32                                          | 5                                                             | 4.78 x 10 <sup>-6</sup>     |
| <i>Irs1</i>          | ENSMUSG000000055980    | Insulin receptor substrate 1                     | Insulin receptor pathway                   | 13                                          | 64                                          | 5                                                             | 1.47 x 10 <sup>-15</sup>    |
| <i>Npl</i>           | ENSMUSG000000042684    | N-acetylneuraminidase                            | Metabolism of sialic acid                  | 2                                           | 13                                          | 5                                                             | 6.09 x 10 <sup>-3</sup>     |
| <i>Cd209a</i>        | ENSMUSG000000031494    | CD209a antigen (DC-SIGN)                         | Pattern recognition receptor               | 6                                           | 33                                          | 6                                                             | 4.7 x 10 <sup>-5</sup>      |
| <i>Ccl17</i>         | ENSMUSG000000031780    | Chemokine (C-C motif) ligand 17                  | Chemokine effective on T cells; binds CCR4 | 7                                           | 47                                          | 6                                                             | 6.02 x 10 <sup>-7</sup>     |
| <i>Tmem221</i>       | ENSMUSG000000043664    | Transmembrane protein 221                        |                                            | 2                                           | 11                                          | 7                                                             | 6.16 x 10 <sup>-4</sup>     |
| <i>Gm15645</i>       | ENSMUSG000000086414    | Predicted gene 15645                             |                                            | 81                                          | 1048                                        | 13                                                            | 5.19 x 10 <sup>-190</sup>   |
| <i>Cd209d</i>        | ENSMUSG000000031495    | CD209d antigen (SIGNR3)                          | Pattern recognition receptor               | 1                                           | 16                                          | 13                                                            | 4.42 x 10 <sup>-7</sup>     |
| <i>4930447C04Rik</i> | ENSMUSG000000021098    | RIKEN cDNA 4930447C04 gene                       |                                            | 2                                           | 34                                          | 16                                                            | 5.27 x 10 <sup>-7</sup>     |
| <i>Pxdn</i>          | ENSMUSG000000020674    | peroxidase                                       | Extracellular matrix formation             | 0                                           | 5                                           | Infinite                                                      | 8.21 x 10 <sup>-3</sup>     |

### Appendix table S2. RNAseq top 20 up-regulated genes in *Ahr*<sup>-/-</sup> B cells.

CD19<sup>+</sup> cells were isolated from *Ahr*<sup>+/+</sup> and *Ahr*<sup>-/-</sup> mice and cultured for 4h in presence of 10 µg/ml α-IgM and 20 ng/ml IL-4, followed by additional 4h in presence of 250 nM FICZ. Genes were ranked according to increasing fold change difference between *Ahr*<sup>+/+</sup> and *Ahr*<sup>-/-</sup> B cells. Gene symbol was assigned according to the MGI database. Average (avg) read counts indicate the number of reads per gene and are directly proportional to the extent of gene expression.
