# Supplementary material for: Aryl hydrocarbon receptor is required for optimal B‐cell proliferation
Source: PubMed Central journal article supplement (PMC5210087; doi:10.15252/embj.201695027), 2016-11-14
Supplement: EMBJ-36-116-s002.pdf [file EMBJ-36-116-s002.pdf]

## Expanded View Figures

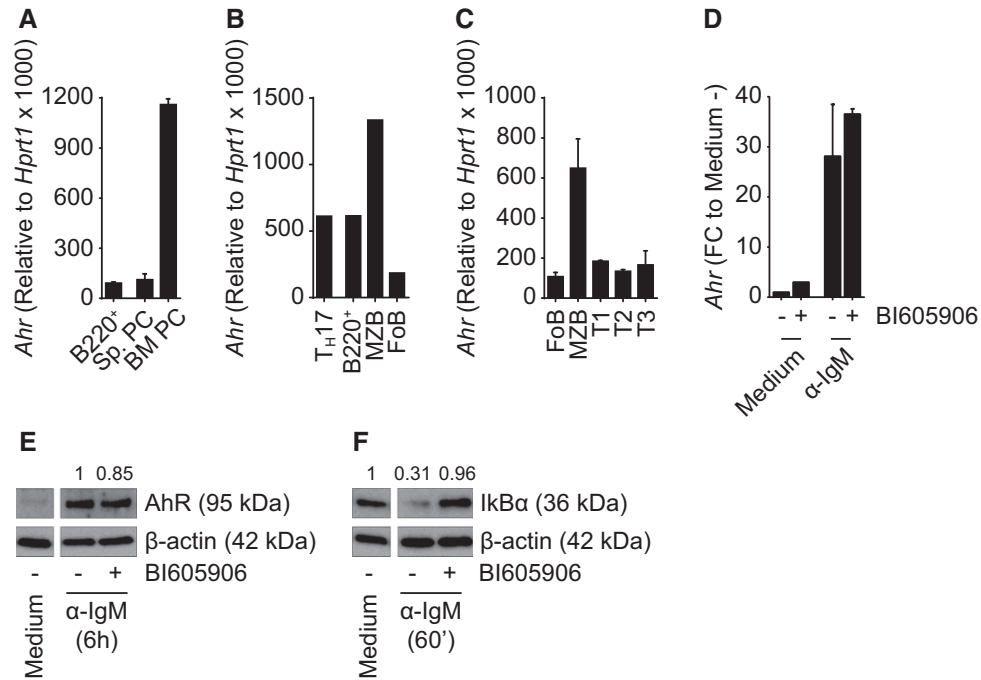**Figure EV1. AhR expression is independent of NF-κB activation.**

- A qPCR analysis of *Ahr* expression in splenic B220<sup>+</sup> and plasma cell (PC) subsets and bone marrow PC subset sorted from C57Bl/6 mice. *Ahr* expression was normalized to *Hprt1*. *n* = 2 independent experiments; mean ± range.
- B qPCR analysis of *Ahr* expression in T<sub>H</sub>17 and splenic B-cell subsets sorted from *Il17Cre R26R eYFP* mice. *Ahr* expression was normalized to *Hprt1*. *n* = 1 experiment; mean.
- C qPCR analysis of *Ahr* expression in splenic B-cell subsets sorted from C57Bl/6 mice. *Ahr* expression was normalized to *Hprt1*. *n* = 2 independent experiments; mean ± range.
- D qPCR analysis of *Ahr* expression in splenic CD19<sup>+</sup> cells isolated from C57Bl/6 mice and cultured for 6 h as indicated. *Ahr* expression was normalized to *Hprt1*; *Ahr* expression was normalized among groups to medium without BI605906 (medium -). *n* = 2 independent experiments; mean ± range. FC: fold change.
- E Western blot analysis of whole protein extract from splenic CD19<sup>+</sup> cells isolated from C57Bl/6 mice and cultured for 6 h as indicated. Values above the blots indicate AhR protein quantification obtained by densitometry, normalized to β-actin and compared to the sample treated with α-IgM without BI605906. Representative data of *n* = 2 independent experiments.
- F Western blot analysis of whole protein extract from splenic CD19<sup>+</sup> cells isolated from C57Bl/6 mice and cultured for 60 min as indicated. Values above the picture indicate IκBα protein quantification obtained by densitometry, normalized to β-actin and compared to the sample treated with medium without BI605906. Representative data of *n* = 2 independent experiments.

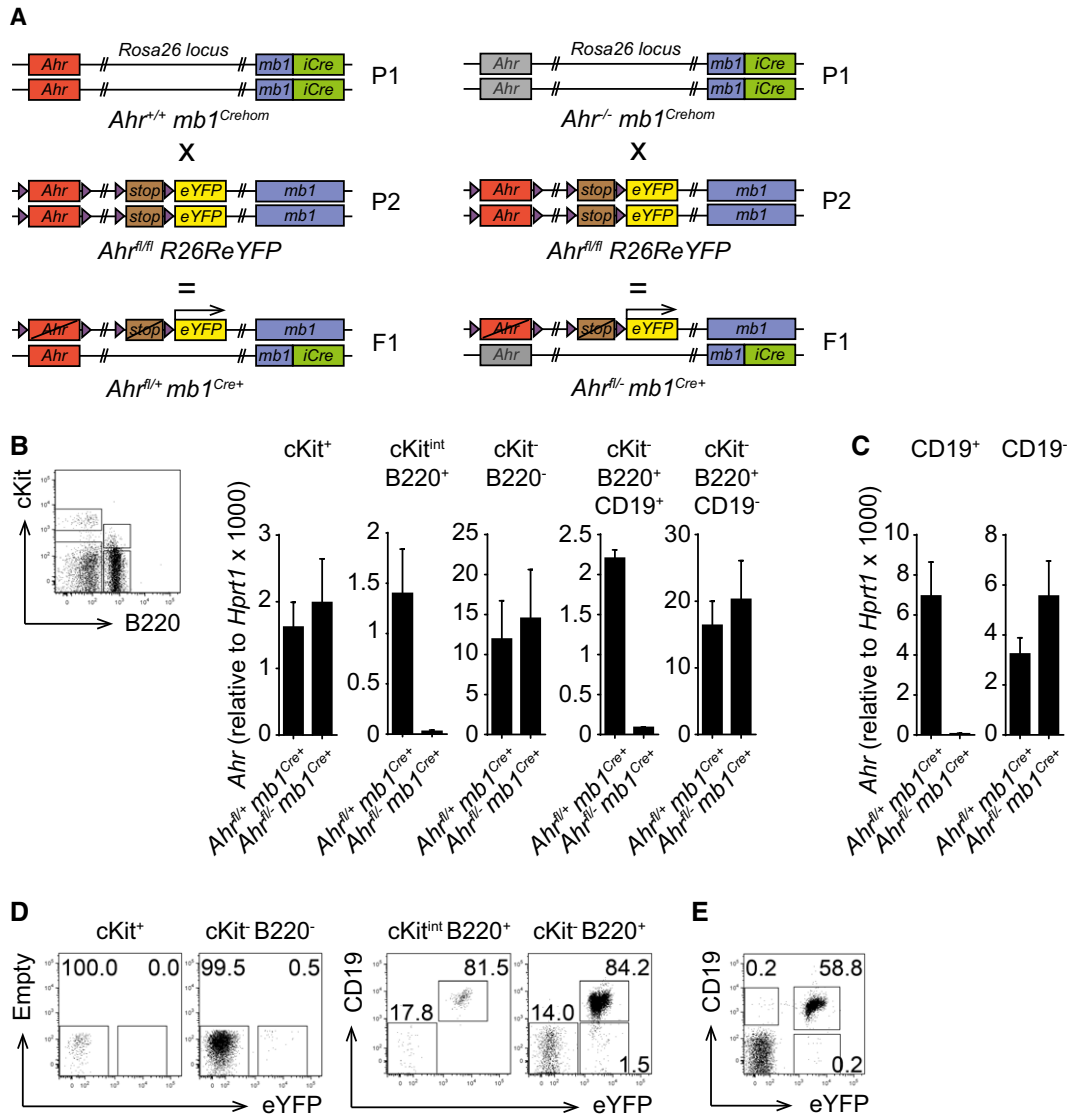

**Figure EV2. The *Ahr*<sup>fl/fl</sup> *R26R* eYFP allele combined with the *mb1*<sup>Cre</sup> system allows B cell-specific *Ahr* deletion and eYFP expression.**

- A Breeding strategy to generate B cell-specific *Ahr*<sup>-/-</sup> mice, all carrying Cre recombinase. *Ahr*<sup>fl/-</sup> *mb1*<sup>Cre+</sup> mice lack *Ahr* in B cells. *Ahr*<sup>fl/+</sup> *mb1*<sup>Cre+</sup> mice are *Ahr*<sup>+/+</sup> in B cells. Cre activity is reported via eYFP expression.
- B, C qPCR analysis of *Ahr* expression in the indicated cell subsets sorted from bone marrow (B) and spleen (C) of non-immune *Ahr*<sup>fl/+</sup> *mb1*<sup>Cre+</sup> and *Ahr*<sup>fl/-</sup> *mb1*<sup>Cre+</sup> mice. *Ahr* expression was normalized to *Hprt1*. Sorting strategy from bone marrow is depicted in the dot plot shown in (B). *n* = 3 independent experiments; mean ± SEM.
- D, E Flow cytometry analysis of eYFP expression in bone marrow (D) and spleen (E) from non-immune *Ahr*<sup>fl/+</sup> *mb1*<sup>Cre+</sup> mice. Cells were gated as indicated above the dot plots. Representative data of *n* = 3 independent experiments.

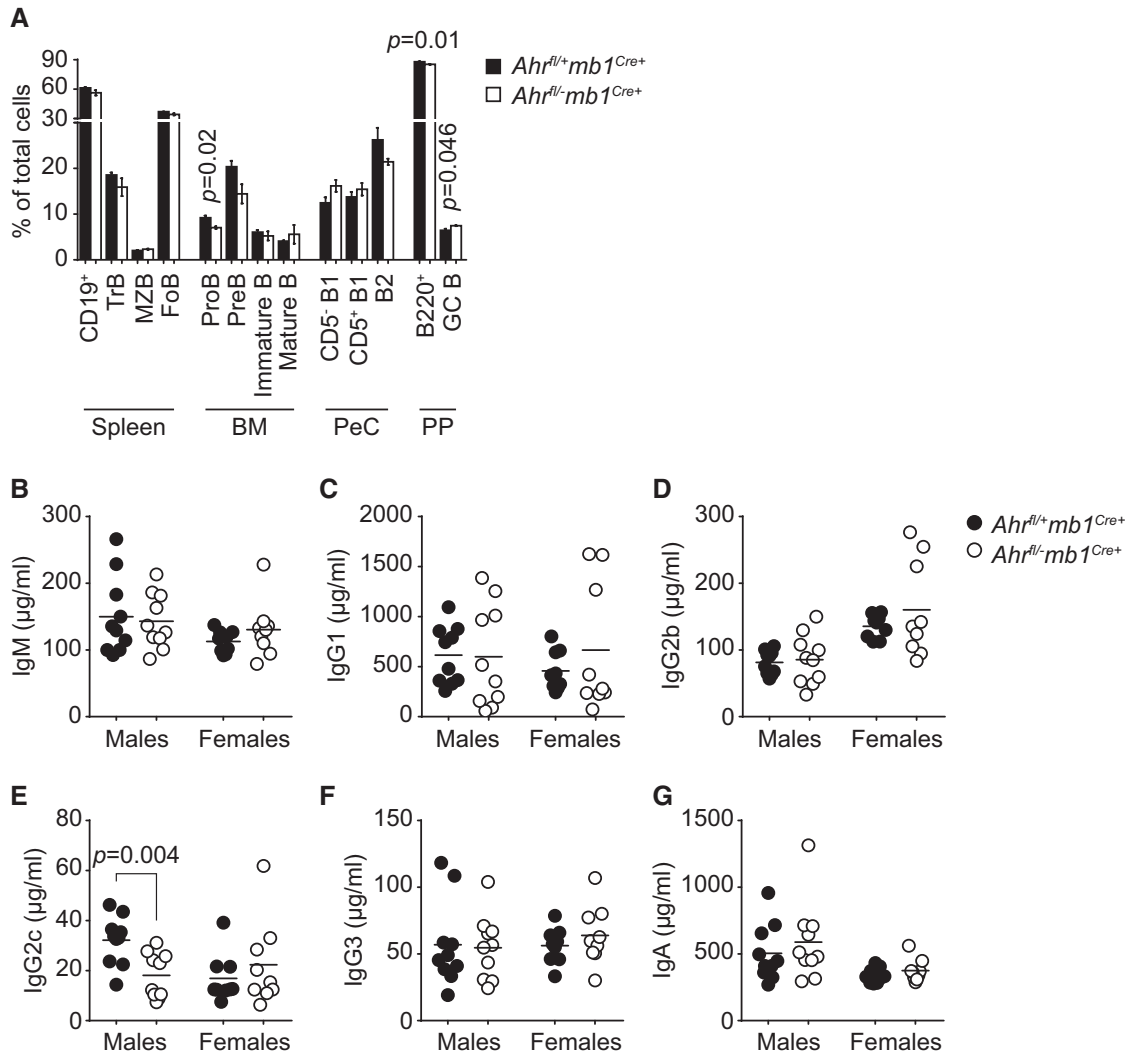

**Figure EV3. B cell-specific *Ahr* deficiency does not cause overt alterations in steady-state B-cell immunity.**

**A** Flow cytometry analysis of distribution of B-cell subsets sorted from spleen, bone marrow (BM), peritoneal cavity (PeC) and Peyer's patches (PP) of eight-week-old male non-immune *Ahr<sup>fl/+</sup> mb1<sup>Cre+</sup>* (black) and *Ahr<sup>fl/-</sup> mb1<sup>Cre+</sup>* (white) mice. *n* = 3 mice per group; mean ± SEM; unpaired two-tailed *t*-test.

**B-G** ELISA quantification of indicated antibody isotypes in the serum of 8-week-old male and female non-immune *Ahr<sup>fl/+</sup> mb1<sup>Cre+</sup>* (black) and *Ahr<sup>fl/-</sup> mb1<sup>Cre+</sup>* (white) mice. Line indicates mean value; unpaired two-tailed *t*-test.

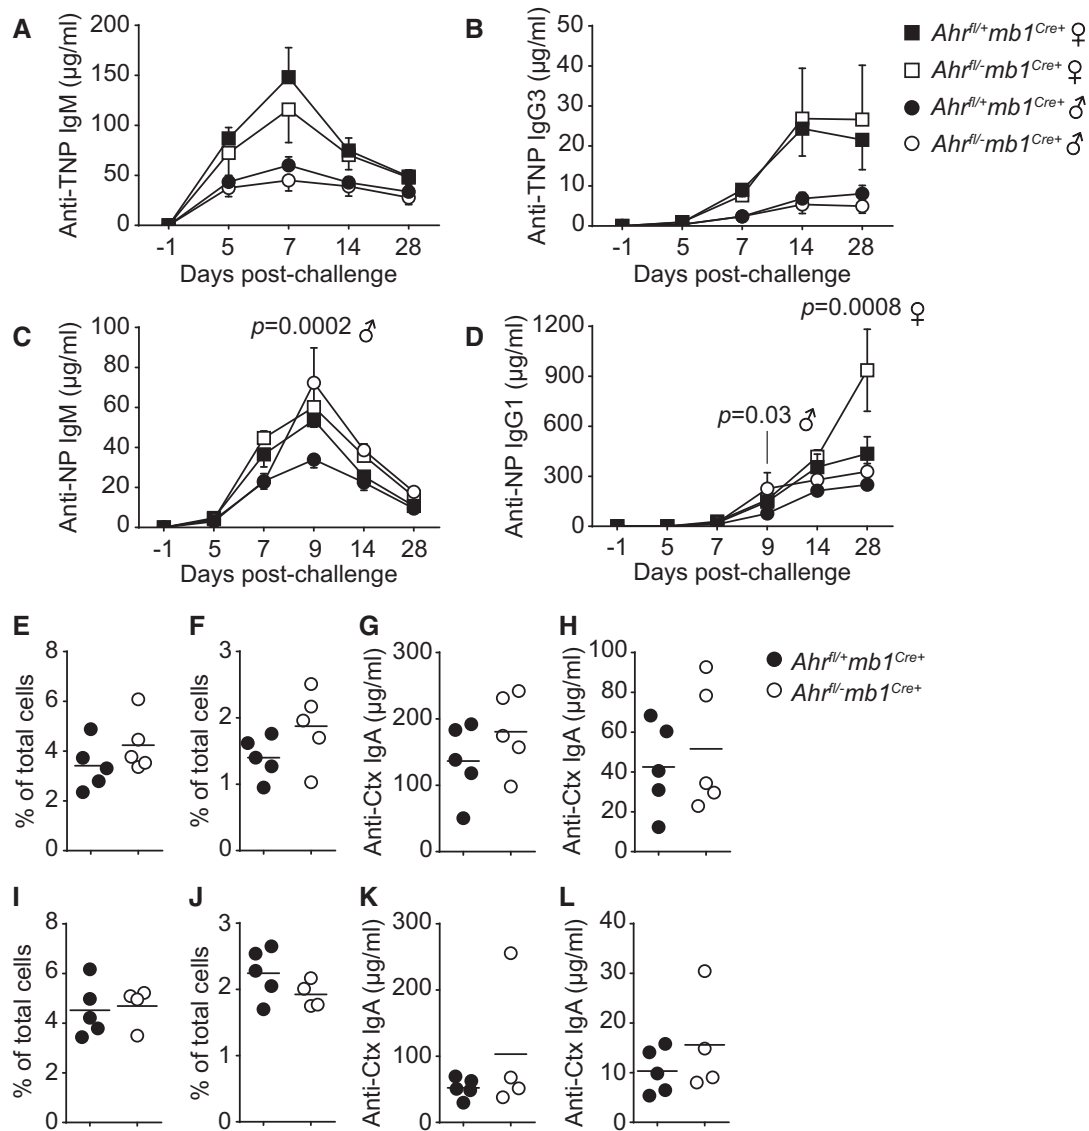

**Figure EV4. B cell-specific *Ahr*-deficient mice respond normally to the T-independent antigen TNP-Ficoll, the T-dependent antigen NP-CGG and mucosal challenge with cholera toxin.**

A–D ELISA quantification at indicated time points of anti-TNP IgM (A), anti-TNP IgG3 (B), anti-NP IgM (C) and anti-NP IgG1 (D) antibodies in the serum of male (circle) and female (square) *Ahr<sup>fl/+</sup>mb1<sup>Cre+</sup>* (black) and *Ahr<sup>fl/-</sup>mb1<sup>Cre+</sup>* (white) mice immunized i.p. with 10  $\mu\text{g}$ /mouse TNP-Ficoll (A, B) or 10  $\mu\text{g}$ /mouse NP-CGG (C, D).  $n = 2$  independent experiments, five mice per group; mean  $\pm$  SEM; two-way ANOVA, Sidak's test.

E–H Flow cytometry analysis of GC B-cell (E, G) and  $T_{\text{FH}}$ -cell (F, H) distributions in Peyer's patches isolated at d14 post-immunization from male (E, F) and female (G, H) *Ahr<sup>fl/+</sup>mb1<sup>Cre+</sup>* (black) and *Ahr<sup>fl/-</sup>mb1<sup>Cre+</sup>* (white) mice immunized i.g. with 2.5  $\mu\text{g}$ /mouse cholera toxin (Ctx). Representative data of  $n = 3$  independent experiments. Line indicates mean value.

I–L ELISA quantification at d14 post-immunization of serum (I, K) and faecal (J, L) anti-Ctx IgA antibodies from male (I, J) and female (K, L) *Ahr<sup>fl/+</sup>mb1<sup>Cre+</sup>* (black) and *Ahr<sup>fl/-</sup>mb1<sup>Cre+</sup>* (white) mice immunized i.g. with 2.5  $\mu\text{g}$ /mouse cholera toxin. Representative data of  $n = 3$  independent experiments. Line indicates mean value.

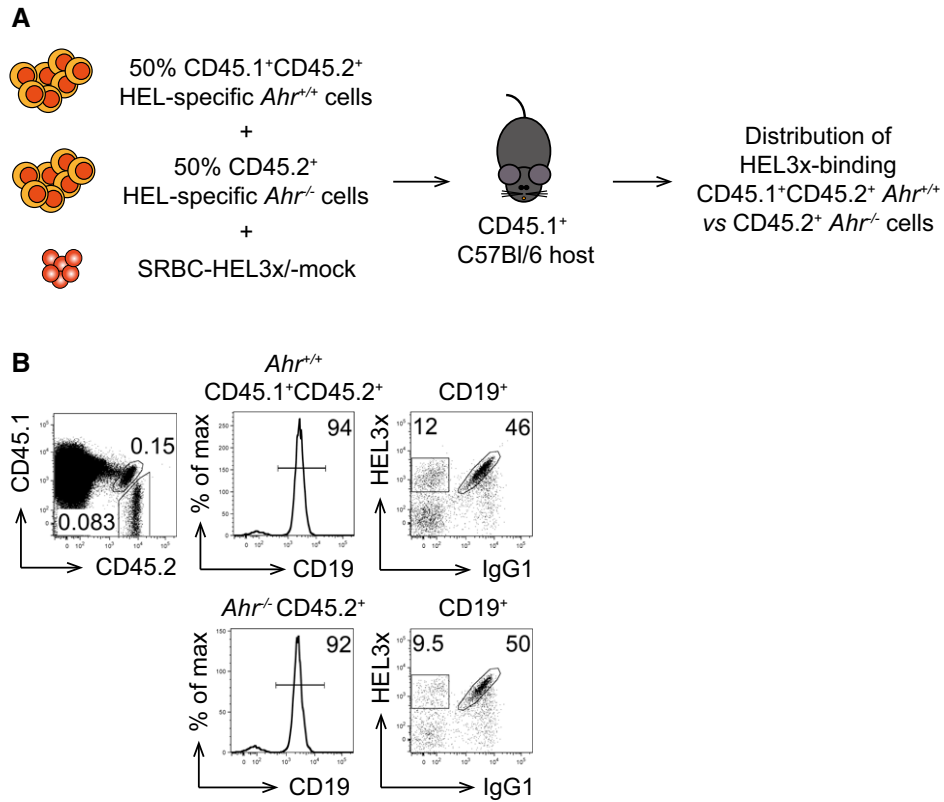

**Figure EV5. AhR deficiency does not affect the affinity maturation process *in vivo*.**

A Host CD45.1 mice were co-transferred with a 1:1 mixture of HEL-specific *Ahr*<sup>+/+</sup> CD45.1<sup>+</sup>CD45.2<sup>+</sup> splenocytes isolated from *SW<sub>HEL</sub> Ahrt/+* mice and HEL-specific *Ahr*<sup>-/-</sup> CD45.2<sup>+</sup> splenocytes isolated from *SW<sub>HEL</sub> Ahrt/-* mice, and SRBC-HEL3x or SRBC-mock. Readout at d10 post-challenge was distribution of HEL3x-binding *Ahr*<sup>+/+</sup> CD45.1<sup>+</sup>CD45.2<sup>+</sup> vs. *Ahr*<sup>-/-</sup> CD45.2<sup>+</sup> cells.

B Flow cytometry analysis of distribution of HEL3x-binding CD45.1<sup>+</sup>CD45.2<sup>+</sup> and CD45.2<sup>+</sup> cells harvested from host mice challenged as indicated in (A). Cells were gated as indicated above the plots. Representative data of *n* = 2 independent experiments.
